# Supplementary material for: Soil microbiome manipulation triggers direct and possible indirect suppression against Ralstonia solanacearum and Fusarium oxysporum
Source: PubMed Central journal article supplement (PMC8041757; doi:10.1038/s41522-021-00204-9), 2021-04-12
Supplement: 41522_2021_204_MOESM1_ESM.pdf [file 41522_2021_204_MOESM1_ESM.pdf]

**Article title:** Soil microbiome manipulation triggers direct and possible indirect suppression against *Ralstonia solanacearum* and *Fusarium oxysporum*

**Authors:** Xuhui Deng, Na Zhang, Zongzhuan Shen, Chengzhi Zhu, Hongjun Liu, Zhihui Xu, Rong Li, Qirong Shen, Joana Falcao Salles

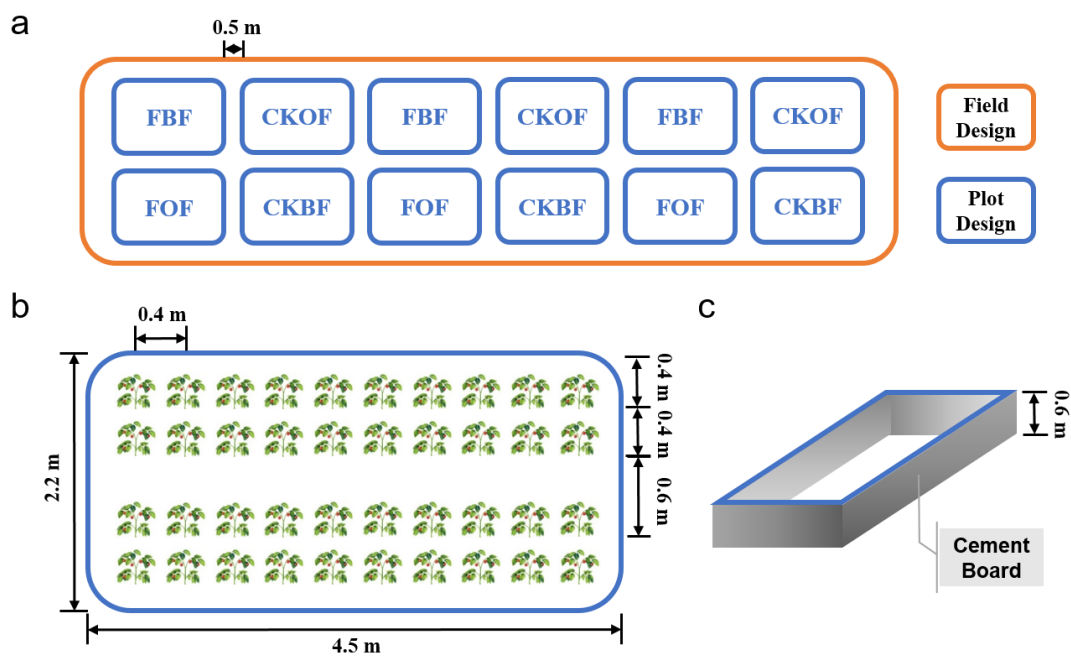

Supplementary Fig 1 field experiment design. a. plots distribution of the field experiment. b. plants distribution of each plot. c. the separation method among plots. CKOF: organic fertilizer was amended in un-fumigated soil; CKBF: bio-organic fertilizer was amended in un-fumigated soil; FOF: organic fertilizer was amended in fumigated soil; FBF: bio-organic fertilizer was amended in fumigated soil.

Supplementary Table 1 Sequences of oligonucleotide primers required for quantitative PCR

| Target group                                  | Primer name and sequence (5'-3')                              | Reference |
|-----------------------------------------------|---------------------------------------------------------------|-----------|
| Bacteria                                      | 338F: ACTCCTACGGGAGGCAGCAG<br>518R: ATTACCGCGGCTGCTGG         | 1         |
| Fungi                                         | ITS1F: TCCGTAGGTGAACCTGCGG<br>5.8S: CGCTGCGTTCTTCATCG         | 1         |
| <i>R. solanacearum</i>                        | FliCF: GAACGCCAACGGTGCGAACT<br>FliCR: GGCGGCCTTCAGGGAGGTC     | 2         |
| <i>F. oxysporum</i> f. sp. <i>Lycopersici</i> | sp1-2f: GCTGGCGGATCTGACACTGT<br>sp1-2r: TTTCGTACTIONGCCAGGTTG | 3         |
| Bacterial 16S RNA gene V4                     | 520F: AYTGGGYDTAAAGNG<br>802R: TAC NVG GGT ATC TAA TCC        | 4         |
| Fungal ITS1                                   | ITS1F: CTTGGTCATTTAGAGGAAGTAA<br>ITS2: GCTGCGTTCTTCATCGATGC   | 5<br>6    |

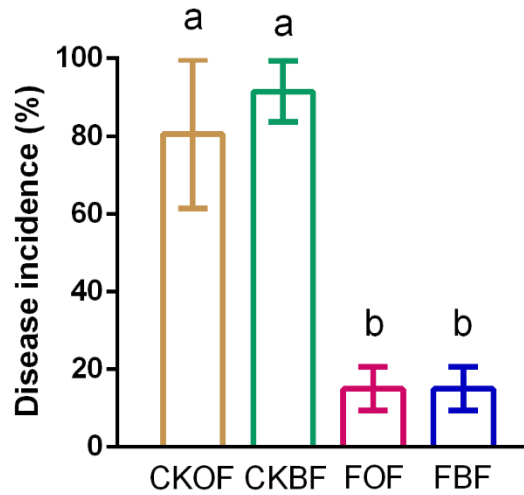

Supplementary Fig 2 Results of tomato wilt disease incidence in Jun, 2014. CKOF: organic fertilizer was amended in non-fumigated soil; CKBF: bio-organic fertilizer was amended in non-fumigated soil; FOF: organic fertilizer was amended in fumigated soil; FBF: bio-organic fertilizer was amended in fumigated soil. All values are the mean of three replicates. Bars with different letters indicate significant differences among the four treatments as defined by Tukey's test ( $p < 0.05$ )

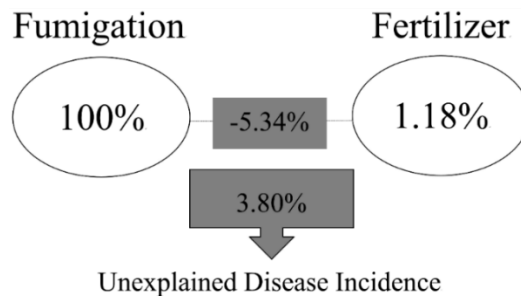

Supplementary Fig 3 variation partitioning analysis (VPA) map of the effects of fumigation and fertilizer type, and interactions of these factors on the disease incidence.

Supplementary Table 2 The number of passing sequences after quality control and Good's coverage values for both bacteria and fungi

| Compartment               | Sample ID | Passing sequences |        | Good's coverage |       |
|---------------------------|-----------|-------------------|--------|-----------------|-------|
|                           |           | Bacteria          | Fungi  | Bacteria        | Fungi |
| Before<br>Planting        | CKOF1     | 105944            | 67255  | 0.986           | 0.996 |
|                           | CKOF2     | 91460             | 51874  | 0.985           | 0.995 |
|                           | CKOF3     | 63802             | 89781  | 0.986           | 0.995 |
|                           | CKOF4     | 91281             | 87444  | 0.987           | 0.996 |
|                           | CKOF5     | 76806             | 95735  | 0.986           | 0.995 |
|                           | CKBF1     | 97331             | 103788 | 0.982           | 0.995 |
|                           | CKBF2     | 79766             | 125125 | 0.984           | 0.995 |
|                           | CKBF3     | 83556             | 76055  | 0.986           | 0.995 |
|                           | CKBF4     | 62977             | 14364  | 0.989           | 0.995 |
|                           | CKBF5     | 96836             | 91789  | 0.990           | 0.996 |
|                           | FOF1      | 94167             | 95912  | 0.987           | 0.993 |
|                           | FOF2      | 77396             | 71338  | 0.982           | 0.994 |
|                           | FOF3      | 112934            | 103866 | 0.990           | 0.994 |
|                           | FOF4      | 83801             | 120361 | 0.988           | 0.994 |
|                           | FOF5      | 98664             | 116674 | 0.986           | 0.995 |
|                           | FBF1      | 68891             | 83806  | 0.990           | 0.995 |
|                           | FBF2      | 87028             | 115308 | 0.984           | 0.994 |
|                           | FBF3      | 82970             | 94519  | 0.983           | 0.994 |
|                           | FBF4      | 89378             | 95774  | 0.987           | 0.994 |
|                           | FBF5      | 100839            | 80097  | 0.985           | 0.994 |
| Bulk Soil<br>Harvest Time | CKOF1     | 67477             | 91527  | 0.976           | 0.994 |
|                           | CKOF2     | 64319             | 48046  | 0.973           | 0.994 |
|                           | CKOF3     | 42254             | 71216  | 0.975           | 0.994 |
|                           | CKOF4     | 45547             | 78436  | 0.975           | 0.993 |
|                           | CKOF5     | 69976             | 72973  | 0.975           | 0.994 |
|                           | CKBF1     | 76151             | 103593 | 0.973           | 0.994 |
|                           | CKBF2     | 120992            | 72272  | 0.972           | 0.994 |
|                           | CKBF3     | 76715             | 73577  | 0.971           | 0.994 |
|                           | CKBF4     | 83396             | 86274  | 0.970           | 0.994 |
|                           | CKBF5     | 94504             | 51708  | 0.972           | 0.995 |
|                           | FOF1      | 134487            | 96740  | 0.976           | 0.993 |
|                           | FOF2      | 113724            | 120849 | 0.972           | 0.992 |
|                           | FOF3      | 131978            | 116760 | 0.972           | 0.993 |
|                           | FOF4      | 143659            | 88434  | 0.974           | 0.993 |
|                           | FOF5      | 122023            | 120336 | 0.975           | 0.993 |
|                           | FBF1      | 120261            | 95035  | 0.974           | 0.993 |
|                           | FBF2      | 113304            | 78187  | 0.973           | 0.992 |
|                           | FBF3      | 158964            | 78441  | 0.973           | 0.993 |
|                           | FBF4      | 127628            | 87161  | 0.976           | 0.992 |
|                           | FBF5      | 151684            | 81342  | 0.973           | 0.993 |

|              |       |         |         |       |       |
|--------------|-------|---------|---------|-------|-------|
|              | CKOF1 | 116237  | 47449   | 0.972 | 0.994 |
|              | CKOF2 | 165403  | 53998   | 0.974 | 0.994 |
|              | CKOF3 | 169319  | 45389   | 0.977 | 0.994 |
|              | CKOF4 | 120080  | 53268   | 0.976 | 0.995 |
|              | CKOF5 | 120682  | 41097   | 0.977 | 0.995 |
|              | CKBF1 | 131111  | 44221   | 0.970 | 0.994 |
| Rhizosphere  | CKBF2 | 169009  | 76643   | 0.972 | 0.995 |
| Harvest Time | CKBF3 | 155318  | 82091   | 0.969 | 0.995 |
|              | CKBF4 | 138453  | 115606  | 0.972 | 0.994 |
|              | CKBF5 | 168553  | 73504   | 0.971 | 0.994 |
|              | FOF1  | 145749  | 100757  | 0.977 | 0.993 |
|              | FOF2  | 136055  | 79157   | 0.977 | 0.993 |
|              | FOF3  | 98694   | 90176   | 0.977 | 0.993 |
|              | FOF4  | 112834  | 114796  | 0.977 | 0.993 |
|              | FOF5  | 145511  | 87205   | 0.977 | 0.994 |
|              | FBF1  | 87097   | 105922  | 0.978 | 0.993 |
|              | FBF2  | 56243   | 89737   | 0.979 | 0.993 |
|              | FBF3  | 105985  | 66024   | 0.977 | 0.994 |
|              | FBF4  | 107429  | 100360  | 0.979 | 0.994 |
|              | FBF5  | 135725  | 100360  | 0.976 | 0.993 |
|              | Mean  |         |         |       |       |
|              | Total | 6390357 | 5061532 |       |       |

---

The Good's coverage values were calculated after rarefaction for each sample.

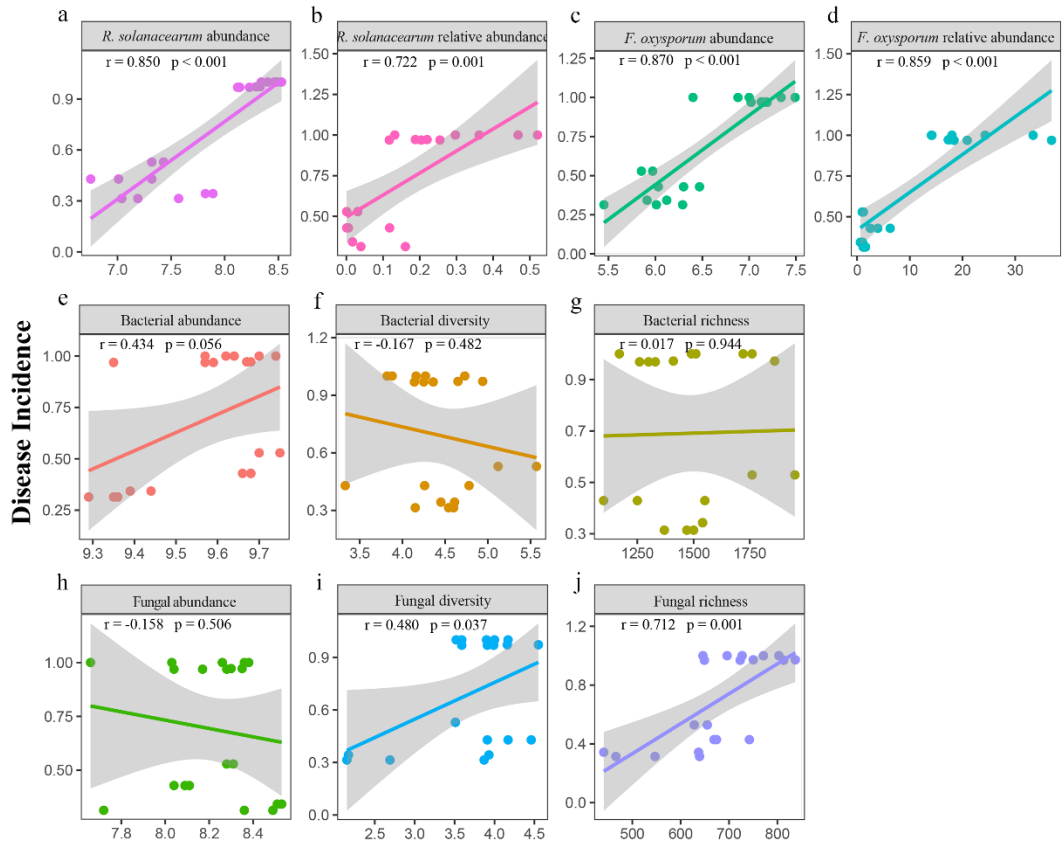

Supplementary Fig 4 Spearman correlations between abundances of *R. solanacearum*, relative abundance of *Ralstonia*, abundances of *F. oxysporum*, relative abundance of *Fusarium*, bacterial abundance (log10 copies per gram soil), bacterial richness (Sobs), bacterial diversity (Shannon), fungal abundance (log10 copies per gram soil), fungal richness (Sobs), fungal diversity (Shannon) and tomato wilt disease incidence.

Supplementary Table 3 Microbial community dissimilarity comparison among treatments using nonparametric statistical method of analysis of molecular variance (AMOVA)

|           |                 | All treatments   | CKOF-CKBF        | FOF-FBF          |
|-----------|-----------------|------------------|------------------|------------------|
| Bacterial | Before planting | <b>&lt;0.001</b> | <b>0.007</b>     | <b>&lt;0.001</b> |
|           | Bulk soil       | <b>&lt;0.001</b> | <b>0.011</b>     | <b>0.002</b>     |
|           | rhizosphere     | <b>&lt;0.001</b> | <b>0.030</b>     | <b>0.024</b>     |
| Fungi     | Before planting | <b>&lt;0.001</b> | <b>&lt;0.001</b> | <b>0.007</b>     |
|           | Bulk soil       | <b>&lt;0.001</b> | <b>&lt;0.001</b> | <b>&lt;0.001</b> |
|           | rhizosphere     | <b>&lt;0.001</b> | 0.090            | <b>&lt;0.001</b> |

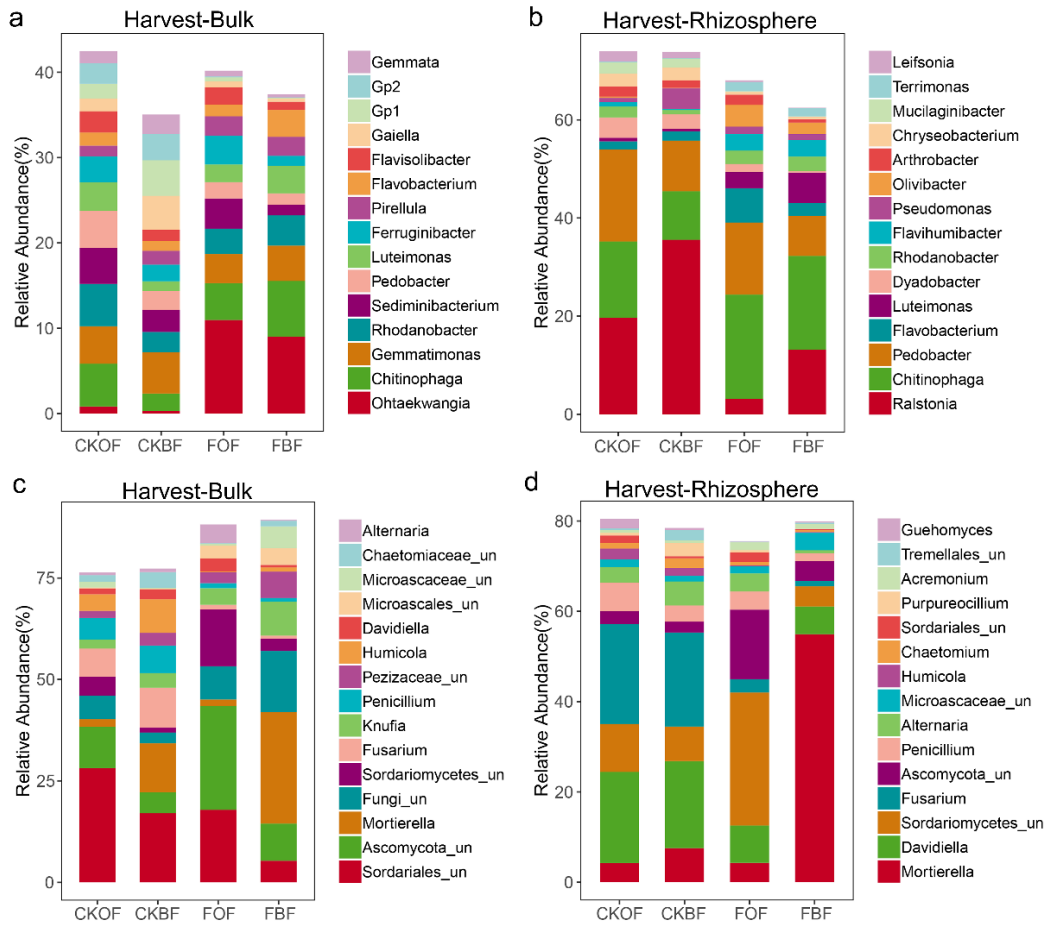

Supplementary Fig 5 Relative abundances of the major Bacterial (a, b) and fungal (c, d) taxa. CKOF: organic fertilizer was amended in un-fumigated soil; CKBF: bio-organic fertilizer was amended in un-fumigated soil; FOF: organic fertilizer was amended in fumigated soil; FBF: bio-organic fertilizer was amended in fumigated soil. All values of each treatment are the mean of five replicates.



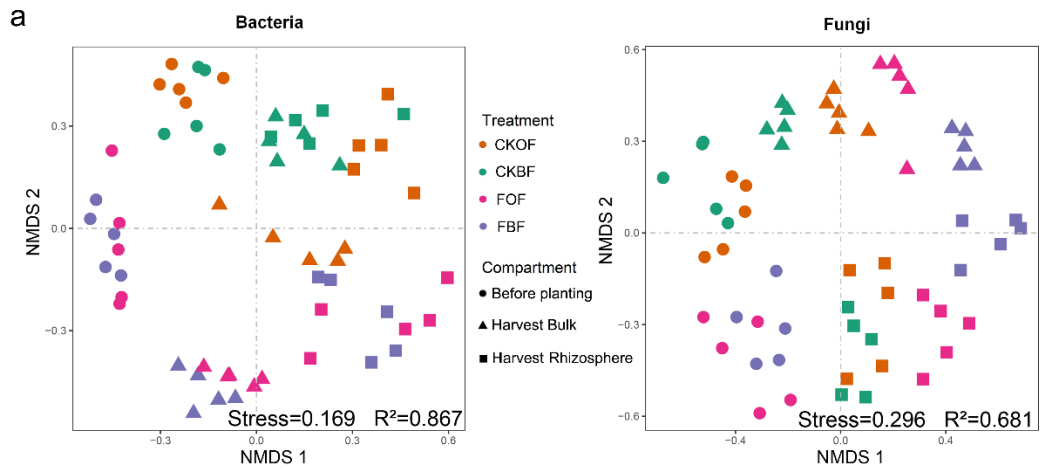

Supplementary Fig 6 Nonmetric multidimensional scaling (NMDS) ordinations of the bacterial and fungal community composition based on Bray-Curtis distance metric in all soil samples. CKOF: organic fertilizer was amended in un-fumigated soil; CKBF: bio-organic fertilizer was amended in un-fumigated soil; FOF: organic fertilizer was amended in fumigated soil; FBF: bio-organic fertilizer was amended in fumigated soil. Circles refer to the samples before planting, triangles refer to the samples of bulk soil at harvest, and squares refer to the rhizosphere samples at harvest.

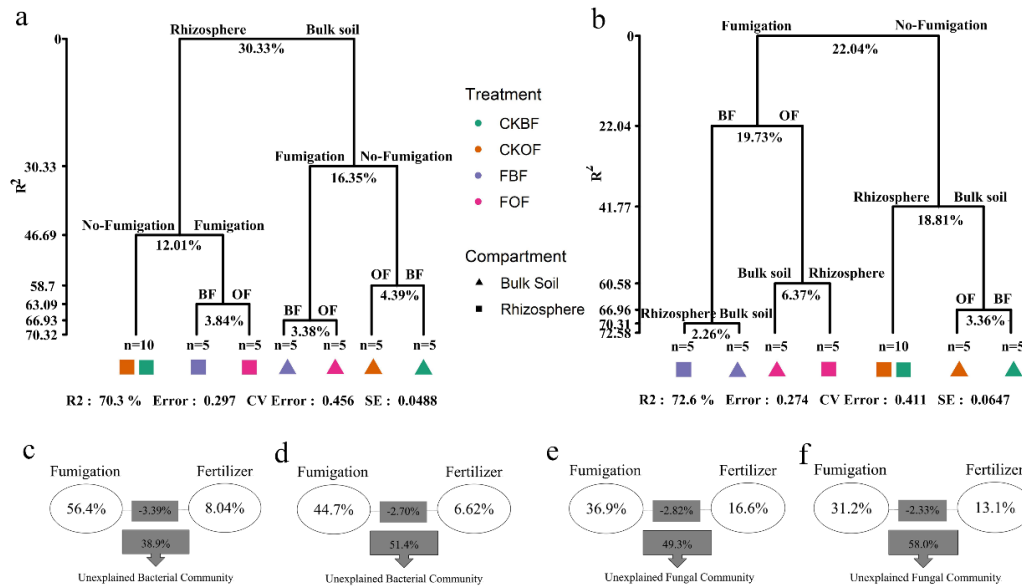

Supplementary Fig 7 Multiple regression tree (MRT) analysis and variation partitioning analysis (VPA) of the microbial community. MRT and VPA all showed treatment effects on the (a) bacterial and (b) fungal community composition. The identity and number of rhizosphere soil samples included in the analysis are shown under the tree. Numbers under the crosses of each split indicate the percentages of variance explained by the split. The  $R^2$ , error, cross-validation error (CV Error), and standard error (SE) of the MRT analysis are listed under the tree. c (Bulk soil) and d (Rhizosphere) showed the bacterial composition at harvest, e (Bulk soil) and f (Rhizosphere) showed the fungal composition at harvest, and circles showed the percentage of variation explained by each factor alone. The percentages of variation explained by the interactions between two of the factors are shown in the squares on the sides. The unexplained variation is depicted in the squares on the bottom. CKOF: organic fertilizer was amended in non-fumigated soil; CKBF: bio-organic fertilizer was amended in non-fumigated soil; FOF: organic fertilizer was amended in fumigated soil; FBF: bio-organic fertilizer was amended in fumigated soil.

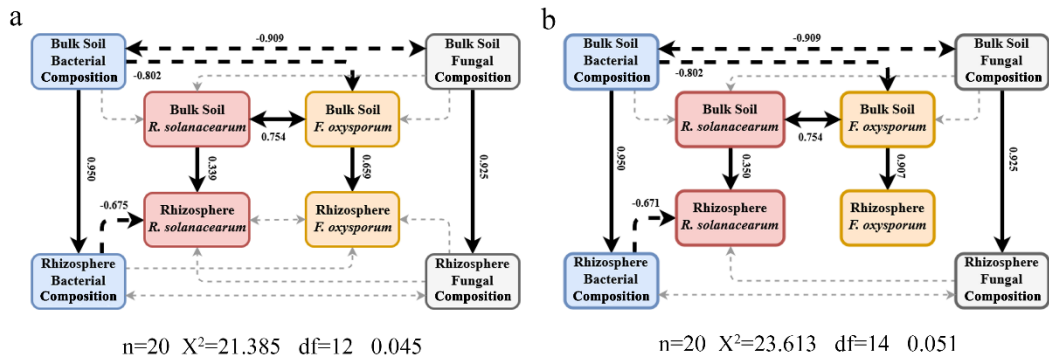

Supplementary Fig 8 Structure equation model of the direct and indirect pathways influencing *R. solanacearum*, *F. oxysporum* and disease incidence. These two incomplete model show the process of production of Fig 6c. Solid and dotted lines represent statistically significant ( $P \leq 0.05$ ) and non-significant relationships, respectively. The path coefficients associated with each arrow of significant relationships are shown.

**Supplementary Methods for Supplementary Fig 9:** The co-occurrence network was calculated through random matrix theory (RMT)-based approach in MENA online pipeline (<http://ieg4.rccc.ou.edu/mena/>)<sup>7</sup>. Only the OTUs detected in more than 80% samples and the relative abundance were more than 0.01% were selected to calculate the Spearman rank correlation matrix. And we calculated two networks for bulk and rhizosphere bacteria and pathogens. The cutoff r value was determined to be 0.52 for bulk and 0.53 for rhizosphere. Topological properties of the networks were computed and visualized by Gephi (version 0.9.2).

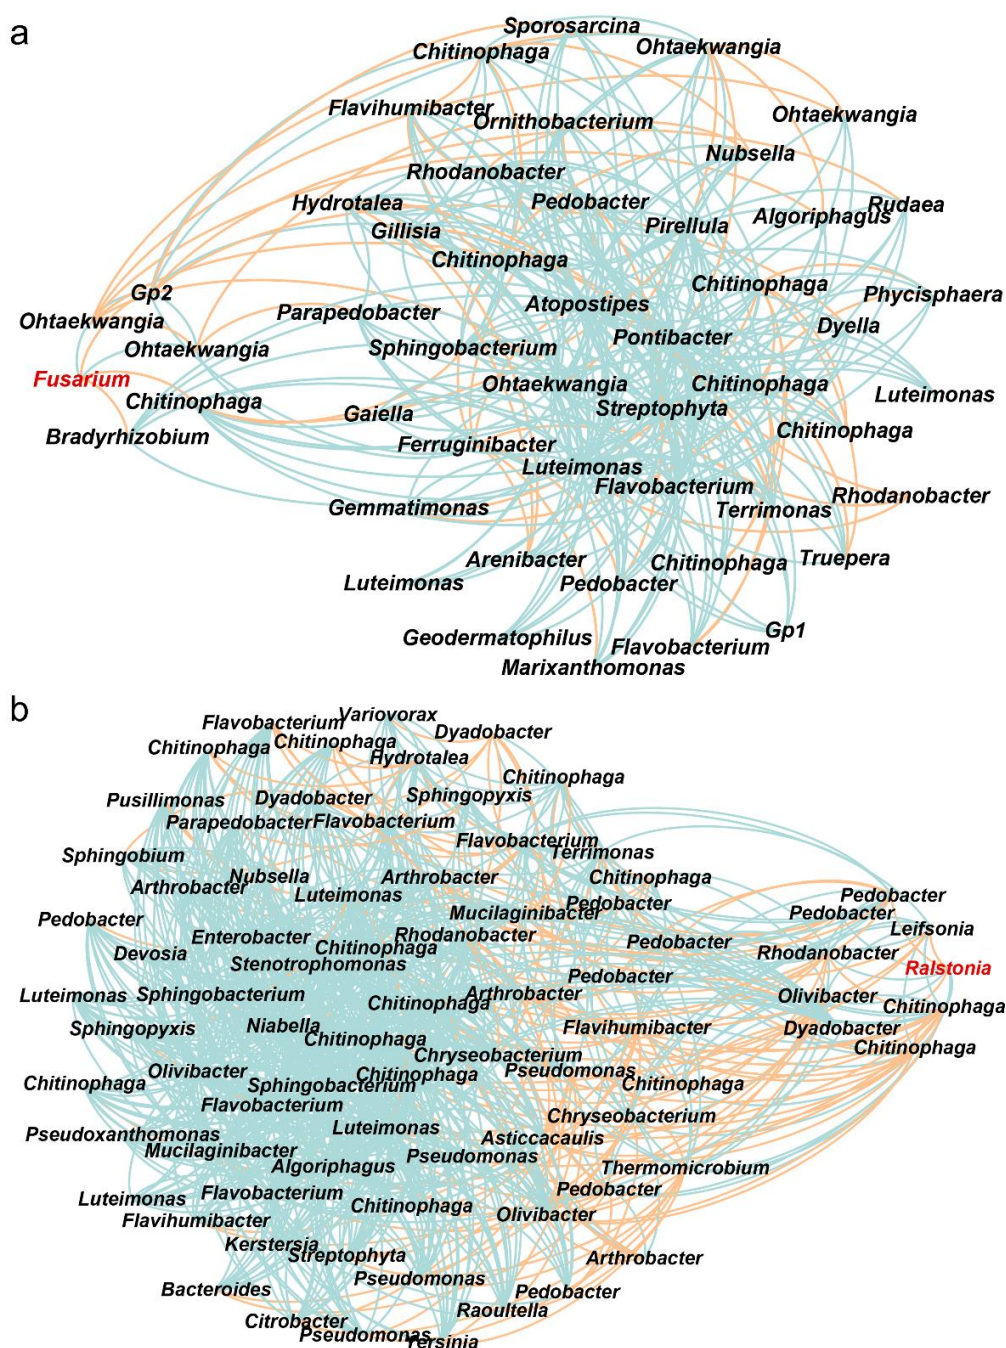

Supplementary Fig 9 Co-occurrence networks for bulk (a) and rhizosphere (b) bacterial OTUs (relative abundance > 0.1%) and pathogens. Yellow lines represent positive correlation, green lines represent negative correlation, and pathogens are shown in red.

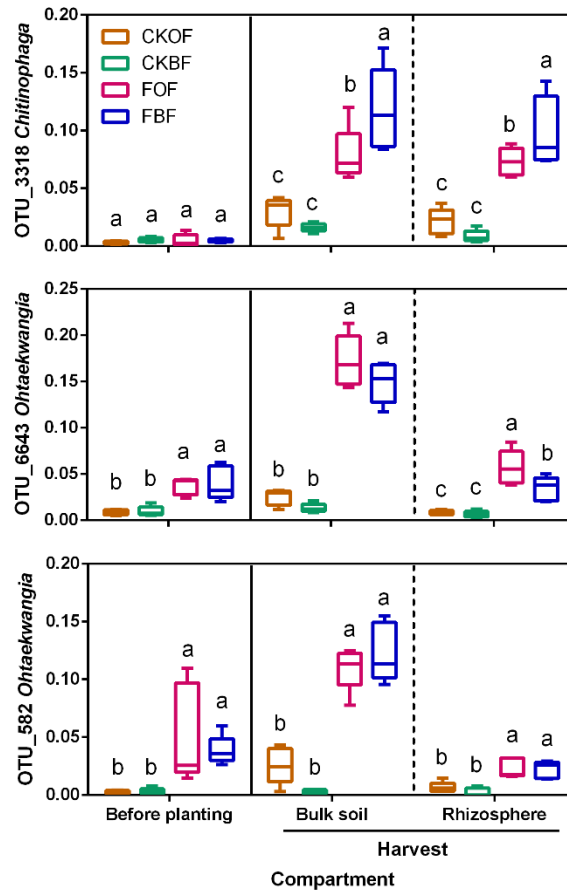

Supplementary Fig 10 Square root of relative abundances of bacterial taxa showing significant correlations with *F. oxysporum* abundance. CKOF: organic fertilizer was amended in non-fumigated soil; CKBF: bio-organic fertilizer was amended in non-fumigated soil; FOF: organic fertilizer was amended in fumigated soil; FBF: bio-organic fertilizer was amended in fumigated soil. The letters indicate significant differences among treatments as determined by Tukey's test ( $p < 0.05$ ).

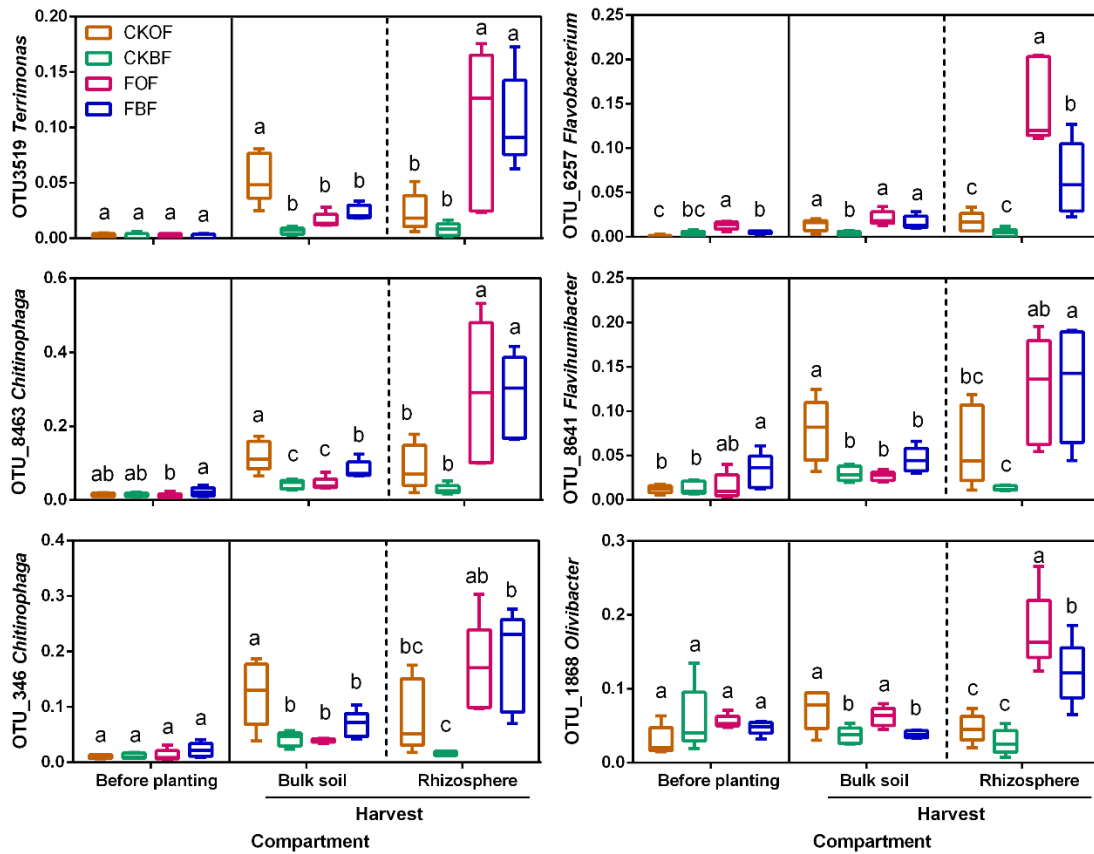

Supplementary Fig 11 Square root of relative abundances of bacterial taxa showing significant correlations with *R. solanacearum* abundance. CKOF: organic fertilizer was amended in non-fumigated soil; CKBF: bio-organic fertilizer was amended in non-fumigated soil; FOF: organic fertilizer was amended in fumigated soil; FBF: bio-organic fertilizer was amended in fumigated soil. The letters indicate significant differences among treatments as determined by Tukey's test ( $p < 0.05$ ).

**Supplementary Methods for Supplementary Fig 12:** For testing the interaction between *Ralstonia solanacearum* and *Fusarium oxysporum* f. sp. *Lycopersici*, we carried out a verification experiment. Two kinds of farmland soils, one was cultured by long-term application of chemical fertilizer (CF) and another was cultured by long-term application of organic fertilizer (OF), were used for this experiment. And two treatments were set: 1. Rs:  $10^6$  cells/ml *R. solanacearum* were inoculated in soils; 2. Rs+FoL:  $10^6$  cells/ml *R. solanacearum* and  $10^6$  spores/ml *F. oxysporum* f. sp. *Lycopersici* were inoculated in soils. Then we planted tomatoes in these soils. Finally, we measured 3 replicates of abundance of *R. solanacearum* in bulk soil and rhizosphere in each kind of soil of each treatment after one month planting by culturable method. The results showed that *F. oxysporum* could promote the abundance of *R. solanacearum* in soils. Thus, the information we got from statistical analysis is verified in this experiment.

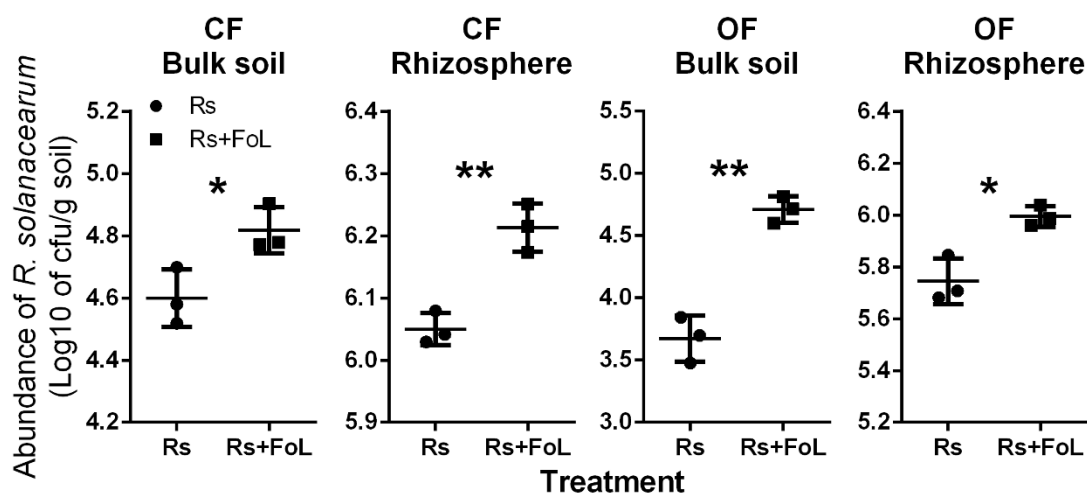

Supplementary Fig 12 Abundance of *Ralstonia solanacearum* in bulk soil and rhizosphere. CF: soils with long-term application of chemical fertilizer, OF: soils with long-term application of organic fertilizer; Rs:  $10^6$  cells/ml *Ralstonia solanacearum* were inoculated in soils, Rs+FoL:  $10^6$  cells/ml *Ralstonia solanacearum* and  $10^6$  spores/ml *Fusarium oxysporum* f. sp. *Lycopersici* were inoculated in soils. Bars with p value among the two treatments was defined by t-test (\*p<0.05, \*\*p<0.01)

## Supplementary Scripts:

###The script details of the UPARSE pipeline:

```
usearch -fastq_mergepairs *_R1.fq -fastqout merged.fq -relabel @
usearch -fastq_filter merged.fq -fastq_trunclen 200 -fastq_maxee 0.5 -fastaout filtered.fa
usearch -fastx_uniques filtered.fa -fastaout uniques.fa -sizeout -relabel Uniq
usearch -cluster_otus uniques.fa -otus otus.fa -uparseout out.up -relabel OTU -minsize 2
usearch -otutab merged.fq -otus otus.fa -otutabout otutab_raw.txt
```

###The script of AMOVA in MOTHUR.

```
sub.sample(shared=otu.shared,size=42254) # 42254 is the data that your data will be rarefied to.
dist.shared(shared= otu.0.03.subsample.shared,calc=jclass-thetayc-braycurtis)
amova(phylip=otu.0.03.subsample.braycurtis.0.03.lt.dist, design=BAC.design)
```

###The script of PCoA and NMDS in MOTHUR.

```
pcoa(phylip=allfunga.0.03.subsample.braycurtis.0.03.lt.dist)
nmds(phylip=wangfun.0.03.subsample.braycurtis.0.03.lt.dist)
```

###MRT

```
library(mvpart)
library(MVPARTwrap)
spe3 <- read.csv("2015bacmrt.csv", row.names=1) # input OTUs data
env3 <- read.csv("2015bacenv.csv", row.names=1) # input environmental data
spe.norm <- decostand(spe3, "normalize")
env3 <- read.csv("mrtenv.csv", row.names=1)
spe.ch.mvpart <- mvpart(data.matrix(spe.norm) ~ ., env3, margin=0.08, cp=0, xv="pick",
xval=nrow(spe3), xvmult=100)
spe.ch.mvpart.wrap <- MRT(spe.ch.mvpart, percent=10, species=colnames(spe3))
summary(spe.ch.mvpart.wrap)
```

###VPA

```
library(vegan)
OTU=read.csv("itst.csv",h=T,row.names=1) # input OTUs data
env=read.csv("env.csv",h=T,row.names=1) # input environmental data or treatment data
mm1=model.matrix(~Fumigation,env)[,-1]
mm2=model.matrix(~Fertilizer,env)[,-1]
otu.hel=decostand(OTU,"hel")
mode=varpart(otu.hel,mm1,mm2)
mode
```

###SEM

```
library(sem)
library(dplyr)
```



```
library(DiagrammeR)
library(lavaan)
library(semPlot)
env=read.table("SEM.txt",header = TRUE)
model <- '
DI~RRS+RFOL+RB+RF          # "~": regressions
RRS~BRS+RB+RF+BB+BF
RFOL~BFOL+RB+RF+BB+BF
BRS~BB+BF
BFOL~BB+BF
RB~BB
RF~BF
BB~~BF                    # "~~": correlations
RB~~RF
RRS~~RFOL
BRS~~BFOL
'
fit <- sem(model, data=env)
summary(fit, standardized=TRUE)
```

## Supplementary reference:

1. Fierer, N., Jackson, J. A., Vilgalys, R. & Jackson, R. B. Assessment of soil microbial community structure by use of taxon-specific quantitative PCR assays. *Appl. Environ. Microbiol.* **71**, 4117–20 (2005).
2. Schönfeld, J., Heuer, H., Van Elsas, J. D. & Smalla, K. Specific and sensitive detection of *Ralstonia solanacearum* in soil on the basis of PCR amplification of *fliC* fragments. *Appl. Environ. Microbiol.* **69**, 7248–7256 (2003).
3. Inami, K. *et al.* Real-time PCR for differential determination of the tomato wilt fungus, *Fusarium oxysporum* f. sp. *lycopersici*, and its races. *J. Gen. Plant Pathol.* **76**, 116–121 (2010).
4. Bates, S. T. *et al.* Examining the global distribution of dominant archaeal populations in soil. *ISME J.* **5**, 908–917 (2011).
5. Gardes, M. & Bruns, T. D. ITS primers with enhanced specificity for basidiomycetes - application to the identification of mycorrhizae and rusts. *Mol. Ecol.* **2**, 113–118 (1993).
6. White, T. *et al.* Amplification and direct sequencing of fungal ribosomal RNA genes for phylogenetics. *PCR Protoc. A Guid. to methods Appl.* **18**, 315–322 (1990).
7. Deng, Y. *et al.* Molecular ecological network analyses. *BMC Bioinformatics* **13**, 1–20 (2012).
